# Supplementary material
Source: publisher site journal article supplement (https://www.dovepress.com/get_supplementary_file.php?f=256759.docx)
Supplement: Supplementary file 1 [file get_supplementary_file.php]

**Supplementary Table 1**. Malpractices associated with the opioids

| **No.** | **Year** | **Opioids** | **Reason for opioid use** | **Alleged breaches of duty of physician** | **Complications** | **Final state** | **Judgment by the court** | **Trial outcome (Plaintiff awarda)** | |
| --- | --- | --- | --- | --- | --- | --- | --- | --- | --- |
| 1 | 1997 | Pentazocine | Abdominal pain | Inappropriate drug choice, neglect of observation | Anaphylaxis | Death | The physician prescribed pentazocine to the patient with a history of pentazocine hypersensitivity. Despite the need for close monitoring after drug administration, the physician discharged the patient immediately after the drug administration. | Plaintiff ($95,174) | |
| 2 | 1999 | Pentazocine, pethidine, morphine | Abdominal pain | Inappropriate drug choice | Respiratory depression | Death | Based on the autopsy findings, the cause of death was judged to be a sudden cardiac death caused by severe arrhythmia. | Defendant | |
| 3 | 2002 | Pethidine | Postoperative pain | neglect of observation, overdose | Opioid use disorder | Opioids dependency | Without consideration of opioid dependency, the physician continued to prescribe excessive amounts of opioids without an effort to find the cause of pain. | Plaintiff ($ 106,798) | |
| 4 | 2003 | Pethidine | Traumatic pain (Abdominal contusion) | Inappropriate drug choice, overdose | Hypotension | Death | The amount of pethidine administered was in the recommended range and there is no evidence that hypotension was due to its administration. | Defendant | |
| 5 | 2004 | Pethidine | Labor pain | Inappropriate drug choice | Fetal hypoxia | Fetal death | The administration of 25 mg of pethidine at intervals of more than two hours was not judged to be malpractice. | Defendant | |
| 6 | 2007 | Tramadol | Chronic calf pain | Inappropriate drug choice | Decreased consciousness (hepatic encephalopathy) | Death | Tramadol was not judged to be a contraindication in patients with liver cirrhosis. | Defendant | |
| 7 | 2007 | Pethidine | Diagnostic test (CT) | Inappropriate drug choice | Respiratory depression | Death | Based on the autopsy findings, the cause of death was judged to be a sudden cardiac death caused by arrhythmia. | Defendant | |
| 8 | 2008 | Morphine | Septic arthritis | Inappropriate drug choice, neglect of observation | Decreased consciousness | Quadriplegia | The plaintiff claimed that the morphine caused hypotension and haloperidol due to nausea and vomiting caused by morphine induced an extrapyramidal symptom, but the court judged that there was no evidence to acknowledge it. | Defendant | |
| 9 | 2008 | Morphine | Abdominal pain | Inappropriate drug choice | Respiratory depression | Death | The morphine was judged not to be an absolute contraindication in patients with liver disease. | Defendant | |
| 10 | 2008 | Pethidine, Ketorolac, Fentanyl (PCA), tramadol | Postoperative pain | neglect of observation, overdose | Delayed diagnosis (compartment syndrome) | Permanent peroneal nerve paralysis | The court judged that, if compartment syndrome is suspected, physicians should be very careful with opioid administration. | Plaintiff ($ 47,002) | |
| 11 | 2009 | Pethidine | Traumatic pain (tibial fracture) | Inappropriate drug choice, neglect of observation | Respiratory depression | Vegetative state | Pethidine was judged to aggravate respiratory depression in the patient with dyspnea. | Plaintiff ($ 137,382) | |
| 12 | 2011 | Nalbuphine | Postoperative pain | neglect of observation, overdose | Respiratory depression | Death | The court judged that the possibility of pulmonary embolism could not be completely ruled out. | Defendant | |
| 13 | 2011 | Pethidine | Abdominal pain | neglect of observation | Delayed diagnosis (compartment syndrome) | Death | Although the consultant physician was advised to stop administering opioids, the defendant continued to administer it, delaying the diagnosis of the small bowel perforation. | Plaintiff ($ 34,111) | |
| 14 | 2011 | Pethidine | Diagnostic test (Colonoscopy) | Inappropriate drug choice, neglect of observation, overdose | Respiratory depression | Death | The court judged that there was no malpractice in the dosage of pethidine or the monitoring after pethidine administration. | Defendant | |
| 15 | 2012 | Pethidine | Abdominal pain | Inappropriate drug choice | Abdominal distention | Death | The court judged that the administration of opioids alone did not lead to the perforated diverticulitis. | Defendant | |
| 16 | 2012 | Pethidine | Postoperative pain | Inappropriate drug choice, neglect of observation | Respiratory depression | Death | The court judged that the administration of pethidine in patient with increased intracranial pressure (ICP) after craniotomy resulted in further ICP and respiratory depression. | Plaintiff ($ 612,569) | |
| 17 | 2013 | Pethidine | Headache (cerebral hemorrhage) | Inappropriate drug choice | Respiratory depression | Vegetative state | There was no finding related to ICP in the patient at the time of administration, and pethidine can be used to prevent the increase of blood pressure. | Defendant | |
| 18 | 2014 | Fentanyl (TD) | Chronic low back pain | Overdose | Respiratory depression | Quadriplegia | The court acknowledged the overdose of transdermal fentanyl patch (50mcg/hr) in the opioid naive patient. | Plaintiff ($ 33,955) | |
| 19 | 2015 | Morphine, pethidine | Headache (cerebellar hemorrhage) | Inappropriate drug choice | Respiratory depression | Hemiplegia | The court judged that the plaintiff's respiratory depression was caused by the compression of brain stem by cerebral hemorrhage rather than opioids. | Defendant | |
| 20 | 2015 | Pethidine, tramadol | Abdominal pain | Overdose | Respiratory depression | Death | The court judged that the plaintiff's respiratory depression was caused by the pulmonary embolism rather than opioids. | Defendant | |
| 21 | 2016 | Sufentanil (PCA) | Postoperative pain | neglect of observation, overdose | Respiratory depression | Quadriplegia | The physician should pay attention to respiratory monitoring when administering opioids in a pediatric patient (6-months old). It was also recognized as a malpractice that the medical staff did not accompany the pediatric patient when being moved from the post anesthetic care unit to the ward. | Plaintiff ($ 855,726) | |
| 22 | 2016 | Pethidine, tramadol | Abdominal pain | neglect of observation, overdose | Decreased consciousness (hepatic encephalopathy) | Death | The autopsy confirmed the tramadol concentration above the toxic concentration in the peripheral and cardiac blood of the deceased. However, the court judged that it was difficult to determine opioids was the only cause of death, considering the deceased's medical condition. | Defendant | |
| 23 | 2016 | Tramadol, fentanyl | Labor pain | Inappropriate drug choice, neglect of observation | Fetal hypoxia | Neonatal ischemic encephalopathy | The plaintiff is a high-risk pregnant woman (> 40 years old), and for high-risk pregnant women, fetal heart rate monitoring is recommended every 15 minutes during the first phase of labor pain. However, despite the tramadol administration, the defendant measured the fetal heart rate at intervals of 30 minutes. | Plaintiff ($ 248,719) | |
| 24 | 2016 | Pethidine | Abdominal pain | Inappropriate drug choice | Opioid use disorder | Not described | The doctor advised the plaintiff with alcohol dependency, to reduce the dosage of opioids several times, warning of the possibility of opioids addiction, but the plaintiff refused. | Defendant | |
| 25 | 2017 | Pethidine, fentanyl (PCA), oxycontin, tramadol | Chronic low back pain | Overdose | Opioid use disorder | Opioids abuse | The plaintiff's opioid abuse was not recognized by the court. | Defendant | |
| 26 | 2017 | Fentanyl | Diagnostic test (endoscopic retrograde cholangiopancreatography) | Inappropriate drug choice, neglect of observation | Respiratory depression | Death | The court judged that there was no malpractice in the monitoring and treatment after fentanyl administration. | Defendant | |
| 27 | 2017 | Remifentanil, morphine, pethidine | Traumatic pain (traffic accident) | neglect of observation, overdose | Respiratory depression | Quadriplegia | Despite administering opioids, the physician did not monitor oxygen saturation. | Plaintiff ($ 429,185) | |
| 28 | 2017 | Fentanyl (PCA) | Postoperative pain | Inappropriate drug choice, neglect of observation | Respiratory depression | Vegetative state | The plaintiff was transferred to the ward using intravenous PCA without any monitoring. | Plaintiff ($ 115,310) | |
| 29 | 2017 | Pethidine | Abdominal pain | Inappropriate drug choice, neglect of observation, overdose | Cardiac arrest | Death | The dose of 25 mg pethidine to the patient with pain was judged not to be a malpractice. | Defendant | |
| 30 | 2018 | Tramadol, fentanyl (TD) | Postoperative pain | neglect of observation | Respiratory depression | Vegetative state | The physician did not monitor vital signs after opioid administration in an old age patient with respiratory diseases. | Plaintiff ($ 59,376) | |
| 31 | 2018 | Pethidine | Postoperative pain | - | Respiratory depression | Death | The physician did not monitor vital signs after opioid administration and there was no doctor on duty at night on the day of the operation. | | imprisonment |

**Abbreviations:** CPR, cardiopulmonary resuscitation; PCA, patient controlled analgesia; TD, transdermal

a: The exchange rate was converted to 1 United States Dollar =1,165 Korean Won considering the mean exchange rate for 2019.
